# Supplementary material for: Mesenchymal chondrosarcoma: An Australian multi‐centre cohort study
Source: PubMed Central journal article supplement (PMC9844591; doi:10.1002/cam4.4849), 2022-05-23
Supplement: CAM4-12-368-s001.pdf [file CAM4-12-368-s001.pdf]

**Supporting information 1.** Summary of literature review of studies evaluating treatments and clinical outcomes of patients with mesenchymal chondrosarcoma.

| Author, Year                           | Study design                                        | Population (Male)     | Median age (range), y | Metastatic at diagnosis (site) | Treatment                                      | Chemotherapy agents                                                                                                                   | Median OS, m      | Median PFS, m | Comment               |
|----------------------------------------|-----------------------------------------------------|-----------------------|-----------------------|--------------------------------|------------------------------------------------|---------------------------------------------------------------------------------------------------------------------------------------|-------------------|---------------|-----------------------|
| Strach et al, (this study)             | Retrospective review 2001-2022                      | 22 MCS (45%)          | 28 (10-59)            | 3 (Lung, node)                 | 17 S<br>2 preop CT<br>8 palliative CT<br>13 RT | D<br>DI<br>+Dz<br>+Vinc<br>+Da<br>VDC/IE<br>VIDE<br>IrT<br>M<br>VDaC<br>E<br>GDo<br>P<br>Durvalumab + Tremilimumab<br>Investigational | 104               | 34            |                       |
| Van Maldegem et al, 2019 <sup>16</sup> | Retrospective review of 4 sarcoma centres 1980-2016 | 25 unresectable (36%) | 27.5 (7-48)           | NR                             | 25 multidrug CT                                | D<br>+Cis<br>++M<br>+C<br>I<br>CisDzV<br>Anastrozole<br>Anti-TIM3<br>IDH inhibitor<br>Durvalumab + Mogamulizumab                      |                   | Mean 6.7      |                       |
| Amer et al, 2019 <sup>3</sup>          | Retrospective review of SEER database 1973-2013     | 226 MCS (54%)         | 32 (NR)               | 24                             | 86 RT                                          | Not reported                                                                                                                          | 34                |               | CT and S not reported |
| Tsuda et al, 2017 <sup>22</sup>        | Retrospective review, 1980-2013                     | 57 MCS                | 33 (6-73)             | 17                             | Localised<br>34 S<br>13 CT+S<br>10 S+RT        | D<br>I<br>Cis<br>carboplatin                                                                                                          | 5y 66%<br>10y 56% | 5y MFS 26%    |                       |

**Supporting information 1.** Summary of literature review of studies evaluating treatments and clinical outcomes of patients with mesenchymal chondrosarcoma.

| Author, Year                           | Study design                                          | Population (Male)                      | Median age (range), y | Metastatic at diagnosis (site) | Treatment                                                             | Chemotherapy agents                              | Median OS, m                                                                | Median PFS, m                 | Comment                                                        |
|----------------------------------------|-------------------------------------------------------|----------------------------------------|-----------------------|--------------------------------|-----------------------------------------------------------------------|--------------------------------------------------|-----------------------------------------------------------------------------|-------------------------------|----------------------------------------------------------------|
|                                        |                                                       |                                        |                       |                                | 6 RT<br>Advanced<br>16 CT                                             | E<br>C<br>V<br>M<br>Da                           | CT 91%<br>No chemo<br>57%                                                   |                               |                                                                |
| Morioka et al, 2016 <sup>23</sup>      | Randomised phase 2 prospective study of TRS 2012-2014 | 5 trabectedin (3 MCS)<br>3 BSC (3 MCS) | <40 (MCS)             | all                            | MCS:<br>4/6 S<br>6 CT (3 preop)<br>1 RT (only reported in case study) | D<br>DCis<br>VDC<br>VDC/IE                       | Trabectedin: 26<br>BSC: not reported                                        | Trabectedin: 13<br>BSC: 1 (p) | 1 PR, 2 SD<br>Analysis of trabectedin grouped MCS with EMCS    |
| Schniederman et al, 2016 <sup>13</sup> | Retrospective review of SEER database, 1973-2011      | 205 (114)                              | 37                    | Not reported                   | Not reported                                                          | Not reported                                     | 64m<br>5y 51%<br>10y 43%                                                    |                               | Multivariate analysis on 104 due to missing data (tumour size) |
| Xu et al, 2015 <sup>9</sup>            | Systematic review 1994-2014 (included case reports)   | 107 MCS from 18 articles (56%)         | 88 <50yrs             | 24                             | 93% S<br>63% CT<br>38% RT<br>40% S+CT<br>7% S+RT<br>15% S+CT+RT       |                                                  | 80<br>5y OS 55%<br>10y OS 44%<br><br>(no difference OS local v met p=0.095) | Median EFS 58                 | Excluded cases/series if patients died in 3m of FU             |
| Frezza et al, 2015 <sup>10</sup>       | Retrospective review of EMSOS cases 1971-2012         | 113 (60)                               | 30 (11-80)            | 17 (lung, bone)                | Localised (96)<br>95 S<br>54 CT (21 preop, 30                         | Localised 96%<br>anthracycline<br>70% alkylating | 17 years<br>Localised 20y<br>Metastatic 3y                                  | Localised 7yrs                | Likely duplication of patients from previous analysis, 128     |

**Supporting information 1.** Summary of literature review of studies evaluating treatments and clinical outcomes of patients with mesenchymal chondrosarcoma.

| Author, Year                        | Study design                                                         | Population (Male) | Median age (range), y | Metastatic at diagnosis (site) | Treatment                                                                                                                                                                               | Chemotherapy agents                                                             | Median OS, m                   | Median PFS, m           | Comment                                                                                      |
|-------------------------------------|----------------------------------------------------------------------|-------------------|-----------------------|--------------------------------|-----------------------------------------------------------------------------------------------------------------------------------------------------------------------------------------|---------------------------------------------------------------------------------|--------------------------------|-------------------------|----------------------------------------------------------------------------------------------|
|                                     |                                                                      |                   |                       |                                | postop, 3 pre and postop)<br>40 RT (38 postop, 1 pre and postop)<br><br>Metastatic (17)<br>2 S (primary, metastatectomy)<br>postop RT<br>3 S (primary)<br>1 RT (primary)                | Metastatic:<br>Trabectedin<br>Epl                                               |                                |                         | cases, 15 excluded as no information                                                         |
| Kawaguchi et al, 2014 <sup>24</sup> | Retrospective review 1979-2010                                       | 37 (20)           | 33 (11 - 65)          | 7 (bone, breast, colon)        | Primary:<br>8 S<br>13 S+CT (10 preop and 3 postop)<br>5 S+RT<br>8 S+CT+RT (1 preop CT+ RT, 2 preop CT and postop RT, 1 preop RT and postop CT, 4 postop CT+RT)<br>1 CT<br>1 RT<br>1 BSC | D (21)<br>+C+Bleomycin<br>+Cis<br>+CDz<br>DI<br>+V<br>+Dz<br>Cis<br>+Do<br>+DzM | 5y 51%<br>10y<br>37%           | DFS<br>5y 23%<br>10y 5% | Localised:<br>RT improved local RFS (p=0.037)<br><br>No influence of CT on survival (p0.397) |
| Shakked et al, 2012 <sup>25</sup>   | Retrospective review of records of senior bone pathologist 1964-2009 | 20 (9)            | 24 (7-37)             |                                | 9 S<br>3 S+CT<br>1 S+RT<br>4 S+CT+RT                                                                                                                                                    | VDC/IE<br>IE<br>DI                                                              | Not reported for entire cohort |                         |                                                                                              |

**Supporting information 1.** Summary of literature review of studies evaluating treatments and clinical outcomes of patients with mesenchymal chondrosarcoma.

| Author, Year                         | Study design                                                      | Population (Male)         | Median age (range), y | Metastatic at diagnosis (site)             | Treatment                                            | Chemotherapy agents                                                                                                        | Median OS, m                               | Median PFS, m | Comment                                                                       |
|--------------------------------------|-------------------------------------------------------------------|---------------------------|-----------------------|--------------------------------------------|------------------------------------------------------|----------------------------------------------------------------------------------------------------------------------------|--------------------------------------------|---------------|-------------------------------------------------------------------------------|
| Italiano et al, 2013 <sup>17</sup>   | Retrospective review of 15 centres 1988-2011                      | 112 CS – 17 MCS (CS: 62%) | CS: 52 (17-84)        | All (135 lung, 40 bone, 8 liver, 39 other) | CT: Multidrug – 98<br>Single – 82<br>S: not stated   | D<br>+I<br>+CisI<br>+Cis<br>+other<br>PegD<br>I<br>+Cis<br>GDo<br>Imatinib<br>Sirolimus+C<br>Trabectedin<br>Dz<br>E<br>IrT |                                            |               | Palliative surgery prognostic for OS (not hedgehog study)                     |
| Dantonello et al, 2008 <sup>11</sup> | Retrospective review of prospective CWS/COSS database 1977 - 2006 | 15 (33%)                  | 16.6 (1-25)           | 1                                          | S: All (8 complete)<br>CT: 13<br>RT: 6               | D<br>+DaCV<br>+DaIV<br>+IMCis<br>+IMCis, carboE→autosct<br>Da<br>+ carboEIV→auto<br>SCT<br>+DEIMV                          | 10y OS 67%                                 | 10y EFS 53%   | 7 induction CT (4 >50% tumour volume regression or histologic devitalisation) |
| Cesari et al, 2007 <sup>15</sup>     | Retrospective database review 1959-2003                           | 28 (39%)                  | 31 (20-71)            | 6 (Bone, lung, kidney, spleen, pancreas)   | S: 24<br>RT: 5<br>CT: 12 (9 localised, 3 metastatic) | SE-91 protocol<br>DI<br>+CisM                                                                                              | 10y OS Chemo 31%<br>No chemo 19% (p=0.008) |               |                                                                               |

**Supporting information 1.** Summary of literature review of studies evaluating treatments and clinical outcomes of patients with mesenchymal chondrosarcoma.

| Author, Year                               | Study design                     | Population (Male) | Median age (range), y | Metastatic at diagnosis (site)               | Treatment                                    | Chemotherapy agents | Median OS, m                             | Median PFS, m    | Comment                         |
|--------------------------------------------|----------------------------------|-------------------|-----------------------|----------------------------------------------|----------------------------------------------|---------------------|------------------------------------------|------------------|---------------------------------|
| Nakashima et al, 1986 <sup>14</sup>        | Case series retrospective review | 111 (47%)         | <sup>a</sup> (5-74)   | 3 (2 lung, 1 LN)                             | <sup>b</sup> 10 S+RT+CT<br>19 S+CT<br>8 S+RT |                     | 29% by 17y                               | DFS 20% (by 17y) |                                 |
| Huvos et al, 1983 <sup>5</sup>             | Retrospective review 1931-1981   | 35 (57%)          | mean 25 (6-70)        | 5 (2 bones, 1 lung, 1 chest wall, 1 breasts) | 4 CT+S<br>8 RT+S<br>1 S+CT<br>10 S+RT        | M                   | 5yr OS 42% (n=32, 3 treatment to recent) |                  |                                 |
| Misc authors 1959-1983 <sup>2, 26-30</sup> |                                  | 127               | 17-30                 |                                              |                                              |                     |                                          |                  | Not included here as historical |
| <b>TOTAL</b>                               |                                  | <b>906</b>        | <b>30 (1-84)</b>      |                                              |                                              |                     | <b>10y 19-67%</b>                        |                  |                                 |

Abbreviations: MCS, mesenchymal chondrosarcoma; S, surgery; RT, radiation therapy; CT, Chemotherapy; preop, preoperative; postop, postoperative; DFS, disease free survival; PFS, progression free survival; OS, overall survival; MFS, metastasis free survival; LN, lymph node; TRS, translocation-related sarcomas; BSC, best supportive care; ; D, doxorubicin; Ir, irinotecan; T, temozolamide; P= pazopanib; V, vincristine; Da, dactinomycin; I, ifosfamide; E, etoposide; Dz, dacarbazine; M, methotrexate; C, cyclophosphamide; G, gemcitabine; Do, docetaxel; Cis, Cisplatin; Ep, Epirubicin; PegD, pegylated doxorubicin; AutoSCT, autologous stem cell transplant; SE-91 protocol<sup>42</sup>

<sup>a</sup>average age not provided

<sup>b</sup>treatment and follow up available for 78 patients
